# Supplementary material for: Respiratory disease mortality in the United Kingdom compared with EU15+ countries in 1985-2015: observational study
Source: PubMed Central journal article supplement — BMJ. 2018 Nov 28;363:k4680. doi: 10.1136/bmj.k4680 (PMC6259045; doi:10.1136/bmj.k4680), 2018-11-28

## Supplemental Tables

Supplemental Table 1: International Classification of Disease (ICD) codes for analysis. Both ICD versions 9 and 10 were used for the analysis.

| ICD Version | Category of Disease | Code                                                | Diagnosis                                                  |
|-------------|---------------------|-----------------------------------------------------|------------------------------------------------------------|
| 9           | Infectious          | 011                                                 | Pulmonary tuberculosis                                     |
|             |                     | 010, 012                                            | Other respiratory tuberculosis                             |
|             |                     | 480-486                                             | Pneumonia                                                  |
|             |                     | 487                                                 | Influenza                                                  |
|             | Obstructive         | 490-493                                             | Bronchitis, chronic and unspecified, emphysema and asthma  |
|             |                     | 494                                                 | Bronchiectasis                                             |
|             |                     | 512                                                 | Pneumothorax and air leak                                  |
|             |                     | 513                                                 | Abscess of lung and mediastinum                            |
|             | Interstitial        | 515                                                 | Post-inflammatory pulmonary fibrosis                       |
|             |                     | 516                                                 | Other alveolar and parietoalveolar pneumonopathy           |
|             | Neoplastic          | 161                                                 | Malignant neoplasm of larynx                               |
|             |                     | 162                                                 | Malignant neoplasm of trachea, bronchus and lung           |
|             |                     | 160-165                                             | Malignant neoplasm of respiratory and intrathoracic organs |
|             | Other               | 518                                                 | Other diseases of lung                                     |
|             |                     | 519                                                 | Other diseases of respiratory system                       |
|             |                     | 514                                                 | Pulmonary congestion and hypostasis                        |
| 517         |                     | Lung involvement in conditions classified elsewhere |                                                            |
| 10          | Infectious          | A15-A16                                             | Respiratory tuberculosis                                   |
|             |                     | J09                                                 | Influenza due to certain identified influenza viruses      |
|             |                     | J10                                                 | Influenza due to other identified influenza virus          |
|             |                     | J11                                                 | Influenza due to unidentified influenza virus              |
|             |                     | J12                                                 | Viral pneumonia, not elsewhere classified                  |
|             |                     | J13                                                 | Pneumonia due to Streptococcus pneumoniae                  |
|             |                     | J14                                                 | Pneumonia due to Hemophilus influenzae                     |
|             |                     | J15                                                 | Bacterial pneumonia, not elsewhere classified              |

|             |       |                                                   |
|-------------|-------|---------------------------------------------------|
|             | J16   | Pneumonia due to other infectious organisms       |
|             | J18   | Pneumonia, unspecified organism                   |
| Obstructive | J40   | Bronchitis, not specified as acute or chronic     |
|             | J41   | Simple and mucopurulent chronic bronchitis        |
|             | J42   | Unspecified chronic bronchitis                    |
|             | J43   | Emphysema                                         |
|             | J44   | Other chronic obstructive pulmonary disease       |
|             | J45   | Asthma                                            |
|             | J47   | Bronchiectasis                                    |
|             | J84   | Other interstitial pulmonary diseases             |
| Neoplastic  | C33   | Malignant neoplasm of trachea                     |
|             | C34   | Malignant neoplasm of bronchus and lung           |
|             | C45.0 | Malignant neoplasm of pleura                      |
| Other       | C30   | Malignant neoplasm of nasal cavity and middle ear |
|             | C31   | Malignant neoplasm of accessory sinuses           |
|             | C32   | Malignant neoplasm of larynx                      |
|             | J81   | Pulmonary edema                                   |
|             | J85   | Abscess of lung and mediastinum                   |
|             | J94   | Pneumothorax and air leak                         |
|             | J98   | Other respiratory disorders                       |

## Supplemental Figures

Supplemental Figure 1: Sensitivity analysis to compare performance between the UK and EU15+ countries for cardiovascular and cerebrovascular diseases. Age-standardised death rates between 1985 and 2015 are shown. UK mortality trends represented with bold line and remaining EU15+ countries are represented in grey-scale. Dashed line represents median mortality for EU15+.

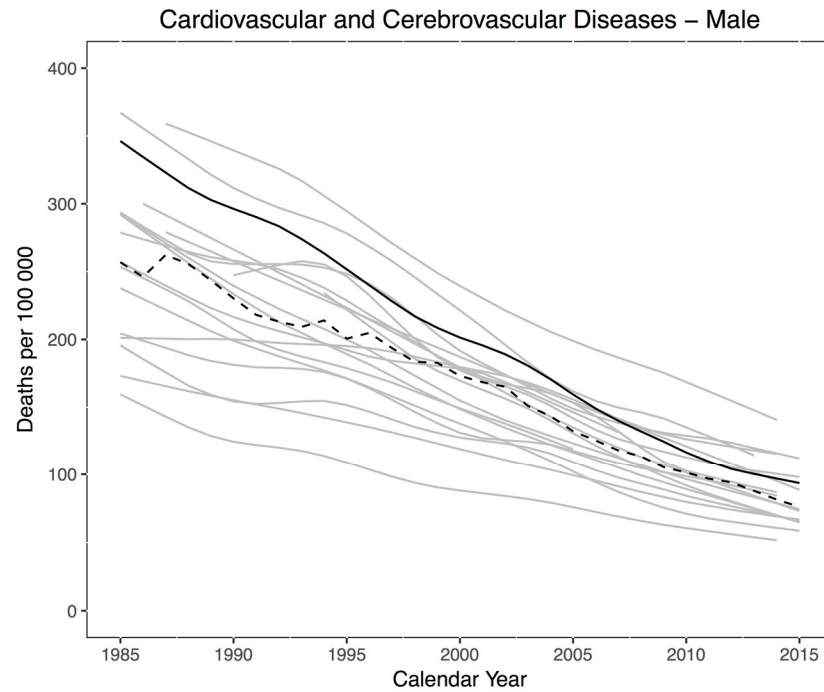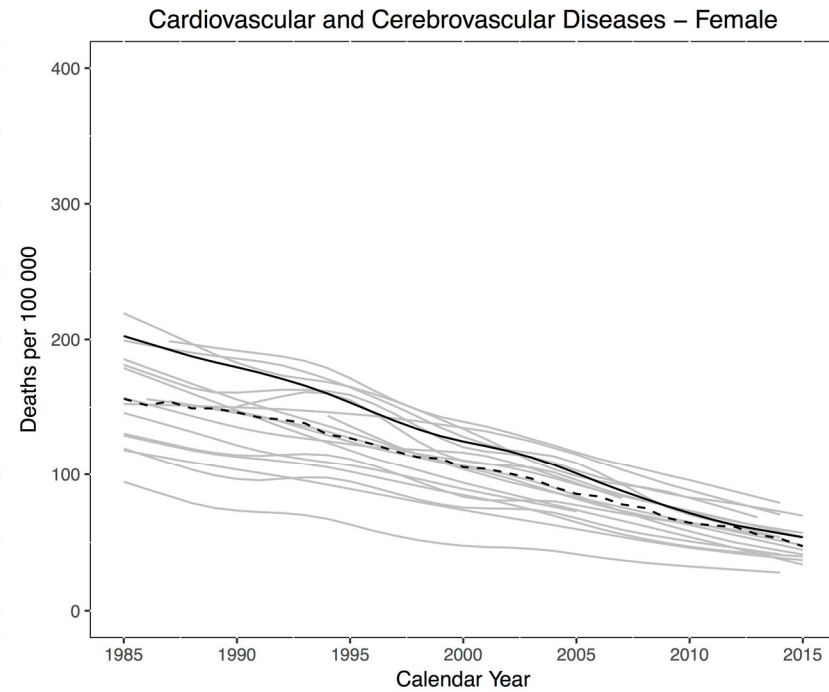

Supplemental Figure 2: Sensitivity analysis to compare performance between the UK and EU15+ countries for combined renal diseases. Age-standardised death rates between 1985 and 2015 are shown. UK mortality trends represented with bold line and remaining EU15+ countries are represented in grey-scale. Dashed line represents median mortality for EU15+.

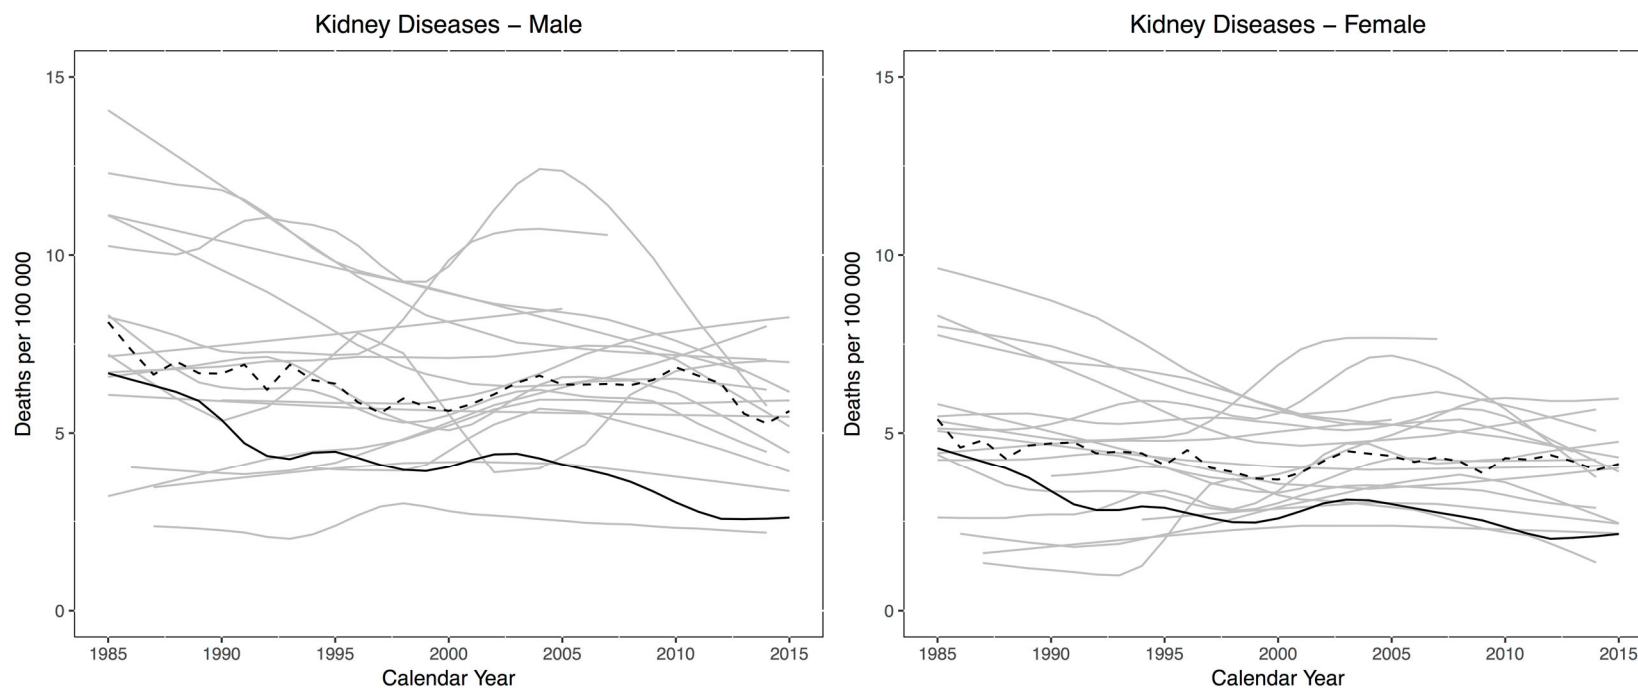

Supplement: salj043917.ww1.pdf [file salj043917.ww1.pdf]
